# Supplementary material for: Targeting YAP/TAZ-TEAD protein-protein interactions using fragment-based and computational modeling approaches
Source: PubMed Central journal article supplement (PMC5453487; doi:10.1371/journal.pone.0178381), 2017-06-01
Supplement: pone.0178381.s001.pdf [file pone.0178381.s001.pdf]

**S1 Figure**

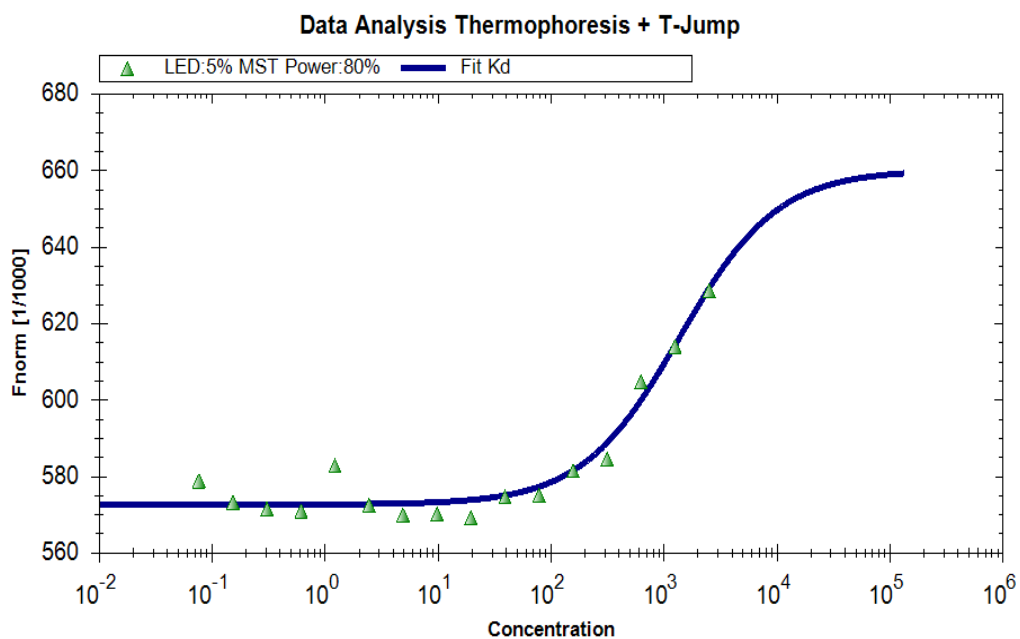

Microscale thermophoresis measurement of mTEAD4 titrated with hit fragment **1**. The data was fitted with a sigmoidal curve to try to obtain the binding affinity ( $K_d$ ). However, saturation of the binding sites with the fragment was not achieved. Thus, the binding affinity could not be accurately determined.

|
