# Supplementary material for: Targeting YAP/TAZ-TEAD protein-protein interactions using fragment-based and computational modeling approaches
Source: PubMed Central journal article supplement (PMC5453487; doi:10.1371/journal.pone.0178381), 2017-06-01
Supplement: pone.0178381.s004.pdf [file pone.0178381.s004.pdf]

S1 Table

| Compound structure                                                                  | AutoDock Vina score | Binding affinity (mM) | Notes      |
|-------------------------------------------------------------------------------------|---------------------|-----------------------|------------|
| 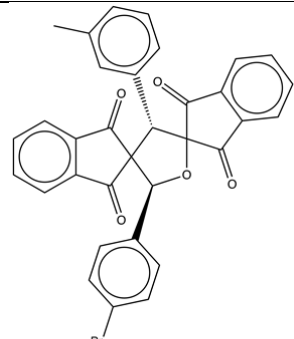   | -8.397              | 0.38                  |            |
|    | -6.74               | 0.4                   | Compound 6 |
|   | -8.382              | 0.77                  |            |
|  | -8.467              | 1.5                   |            |
|  | -8.312              | 1.5                   |            |

|                                                                                   |        |              |  |
|-----------------------------------------------------------------------------------|--------|--------------|--|
| 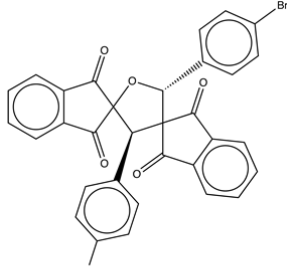 | -8.188 | 6            |  |
|  | -8.388 | Did not bind |  |
|  | -8.336 | Did not bind |  |

Summary of virtual hits identified by docking, and their corresponding experimental binding affinities. Accurate determination of the binding affinities was not possible due to poor solubility of the compounds.
